# Supplementary material for: TEMPO-Oxidized Cellulose Beads as Potential pH-Responsive Carriers for Site-Specific Drug Delivery in the Gastrointestinal Tract
Source: PubMed Central journal article supplement (PMC7919685; doi:10.3390/molecules26041030), 2021-02-15
Supplement: molecules-26-01030-s001.pdf [file molecules-26-01030-s001.pdf]

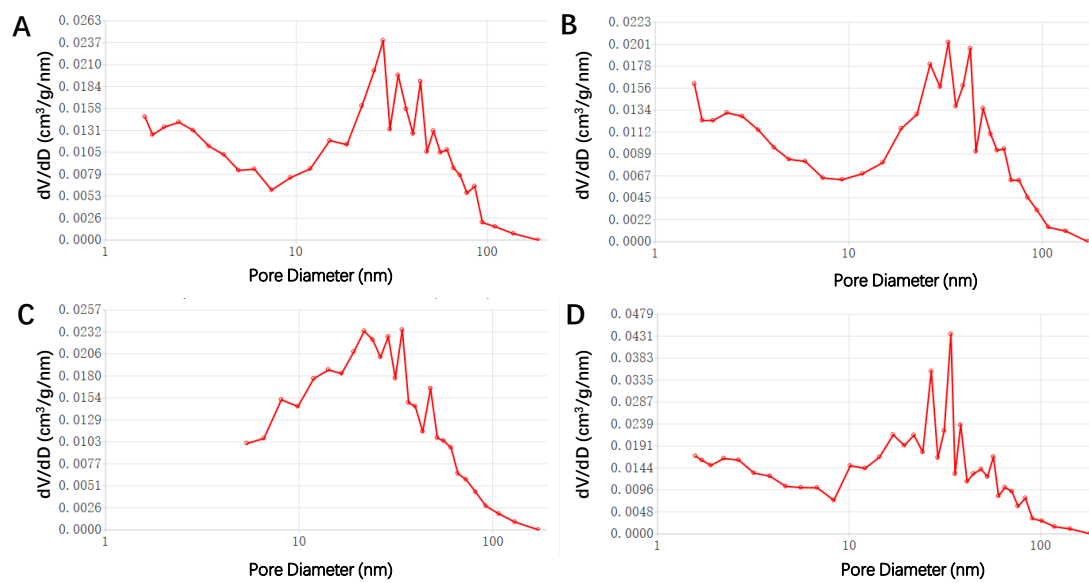

Figure S1. Pore distribution of (A) OCBs-1, (B) OCBs-2, (C)OCBs-3 and (D)OCBs-4.
